# Supplementary material
Source: publisher figshare collection journal article supplement (https://acs.figshare.com/ndownloader/files/3825724)
Supplement: Supplementary file 1 [file 3825724]

## Supporting Information

For

# Design of a Highly Efficient and Wide pH E-Fenton Oxidation System with Molecular Oxygen Activated by Ferrous-Tetrapolyphosphate Complex

*Li Wang, Menghua Cao, Zhihui Ai, and Lizhi Zhang\**

Key Laboratory of Pesticide & Chemical Biology of Ministry of Education, Institute of Environmental Chemistry, Central China Normal University, Wuhan 430079, P. R. China

**The detection of H<sub>2</sub>O<sub>2</sub> in the absence of iron electrode:** The hydrogen peroxide concentrations in the absence of iron electrode were determined by triiodide method. 0.75 mL of chromogenic agent containing 0.4 mol L<sup>-1</sup> potassium iodide, 0.06 mol L<sup>-1</sup> sodium hydroxide, and 1 × 10<sup>-4</sup> mol L<sup>-1</sup> ammonium molybdate was mixed with 0.75 mL of 1,2-benzenedicarboxylic acid (0.1 mol L<sup>-1</sup>), followed by the addition of 1.5 mL of sample solution. The mixed solutions were analyzed after 2 min, measuring the absorbance at 352 nm with a UV-vis spectrophotometer (UV-2550, Shimadzu, Japan).

**The detection of H<sub>2</sub>O<sub>2</sub> in the presence of iron electrode:** The fluorescence reagent containing 2.7 mg of para-hydroxyphenylacetic acid and 1 mg of horseradish peroxidase in 10 mL of 8.2 g L<sup>-1</sup> potassium hydrogen phthalate buffer solution was prepared firstly. For the real-time H<sub>2</sub>O<sub>2</sub> concentration detection, 50 µL of fluorescence reagent was mixed with 2 mL of the sample for 10 min, followed by the addition of 1 mL of NaOH (0.1 mol L<sup>-1</sup>) to quench the reaction and maintain the reaction solution at pH 10.0 or higher. But for the measurement of accumulative H<sub>2</sub>O<sub>2</sub> concentration, 10 mL of the fluorescence reagent was added to the reaction solution of different

---

\* To whom correspondence should be addressed. E-mail: [zhanglz@mail.ccnu.edu.cn](mailto:zhanglz@mail.ccnu.edu.cn). Phone/Fax: +86-27-6786 7535

electrochemical system instead of atrazine solution, 2 mL of the samples were taken out at predetermined time intervals, and then 1 mL of 0.1 mol L<sup>-1</sup> NaOH solution was added. The reaction product of H<sub>2</sub>O<sub>2</sub> with POHPAA fluorescence reagent had a strong fluorescent emission at 409 nm when excited at 315 nm.

**Pre-treatment process of the reaction mixture:** 20 mL of sample was extracted with 20 mL dichloromethane for three times. The combined extracts were dried with anhydrous sodium sulfate and the dichloromethane was removed using a rotary evaporators. The residue was re-dissolved in 1 mL of acetone GC-MS analysis or acetonitrile for LC-MS detection.

**Identification of degradation intermediates by GC-MS and LC-MS.** The identification of degradation intermediates was first performed by GC-MS. The final acetone extract (1.0 µL) was automatically injected into GC-MS with splitless mode. The oven temperature program was as follows. The initial temperature was 50 °C and held for 3 min, then heat up to 260 °C with a rate of 7 °C min<sup>-1</sup>, and held at 260 °C for 10 min. The possible degradation intermediates were then identified by LC-MS. The column was maintained at 30 °C; the injected volume was 10 µL. The mobile phase used for gradient elution consisted of (A) acetonitrile and (B) water containing 0.75% formic acid. The gradient was linear from 95 to 50% of B in 30 min, followed by 50 to 10% of B in 5 min, and then held for 5 min. the mass spectra were recorded across the range of 50-300 m/z with the positive scan mode.

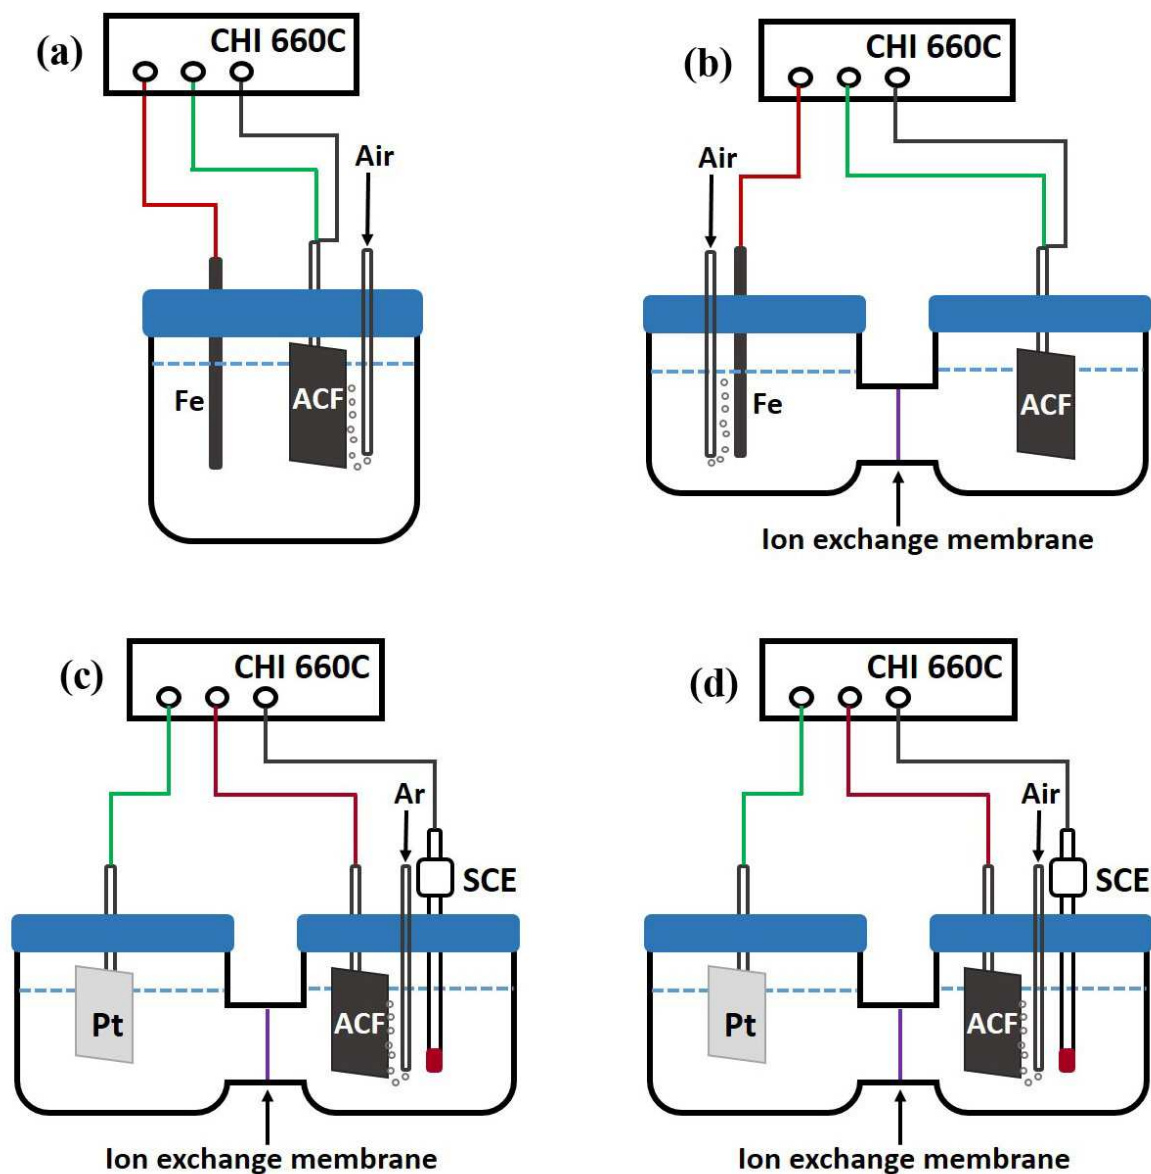

**Figure S1.** Configurations of the different electrochemical systems: (a)  $\text{Na}_6\text{TPP-EF}$  or  $\text{Na}_2\text{SO}_4\text{-EF}$  system (b)  $\text{Na}_6\text{TPP-EC}$  system (c) the separated dual-cell electrochemical system for the regeneration of  $\text{Fe(II)}$  by  $\text{Fe(III)}$  reduction on the ACF cathode (d) the separated dual-cell electrochemical system for atrazine degradation via the molecular oxygen activation process induced by the regenerated  $\text{Fe(II)}$ .

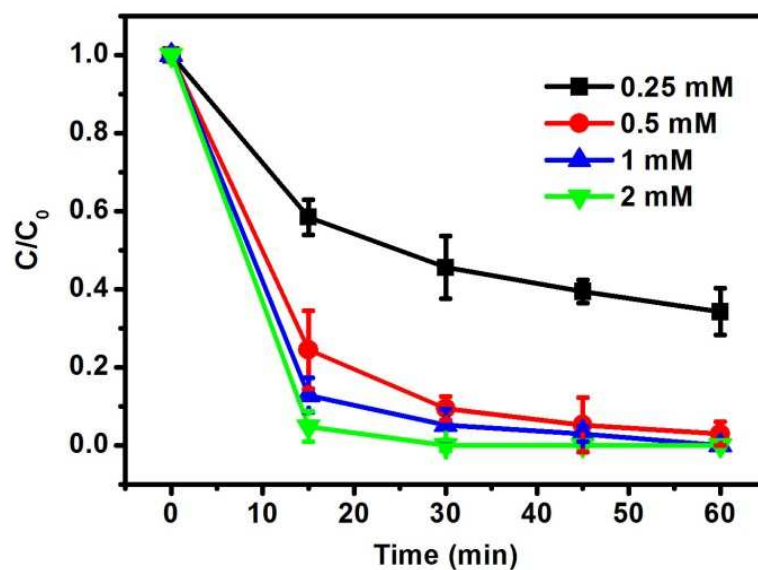

**Figure S2.** Effect of  $\text{Na}_6\text{TPP}$  concentration on the atrazine degradation in the  $\text{Na}_6\text{TPP}$ -EF system.

The constant current was 0.5 mA, the concentration of atrazine was  $10 \text{ mg L}^{-1}$ , and the initial pH values were about 8.0.

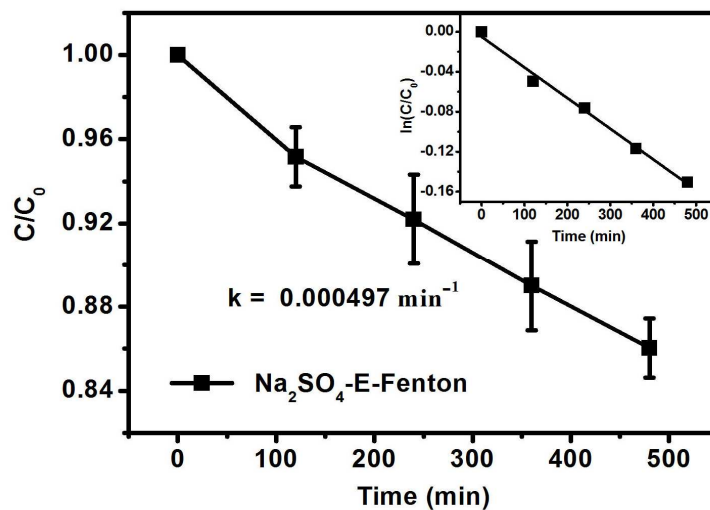

**Figure S3.** The atrazine degradation in the  $\text{Na}_2\text{SO}_4$ -EF system at pH 8.0. The constant current was 0.5 mA, the concentration of atrazine was  $10 \text{ mg L}^{-1}$ , and 0.5 mM of  $\text{Na}_2\text{SO}_4$  was used as the electrolyte.

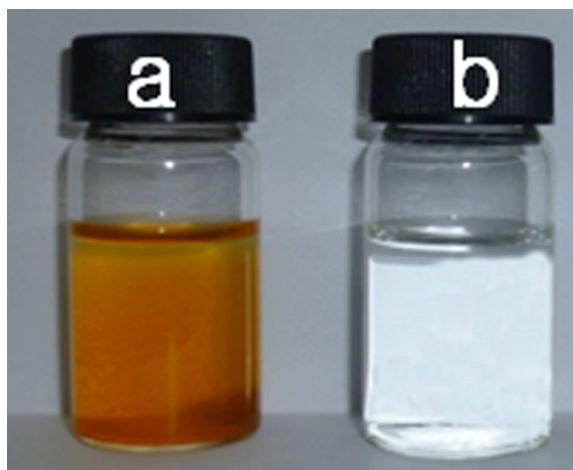

**Figure S4.** Pictures of the solutions of the  $\text{Na}_2\text{SO}_4$ -EF (a) and  $\text{Na}_6\text{TPP}$ -EF (b) systems after 180 min.

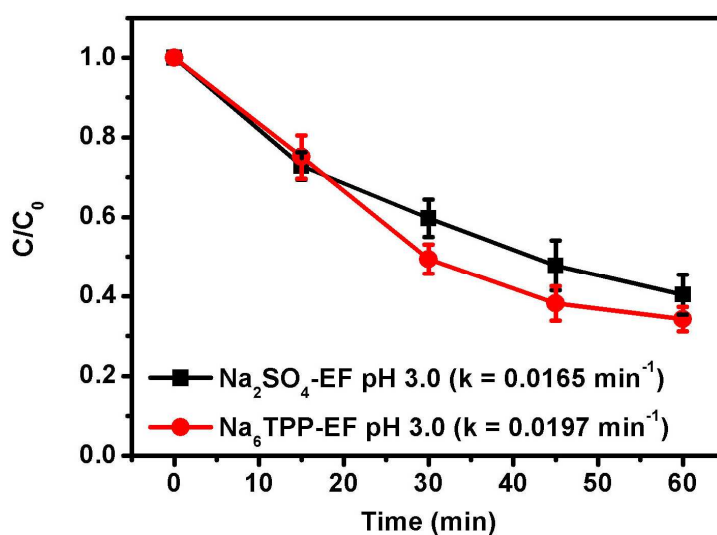

**Figure S5.** The atrazine degradation in the  $\text{Na}_2\text{SO}_4$ -EF and  $\text{Na}_6\text{TPP}$ -EF system at pH 3.0 with 0.5 mM of  $\text{Na}_6\text{TPP}$  or  $\text{Na}_2\text{SO}_4$  as the electrolyte under a constant current of 0.5 mA. The initial concentration of atrazine was  $10 \text{ mg L}^{-1}$ .

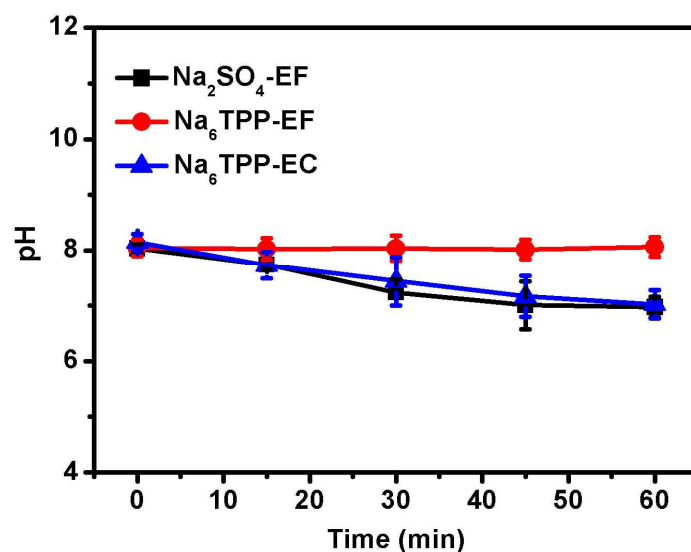

**Figure S6.** The pH value variations in different systems with 0.5 mM of Na<sub>6</sub>TPP or Na<sub>2</sub>SO<sub>4</sub> as the electrolyte under a constant current of 0.5 mA. The initial concentration of atrazine was 10 mg L<sup>-1</sup>. The initial pH values were 8.0.

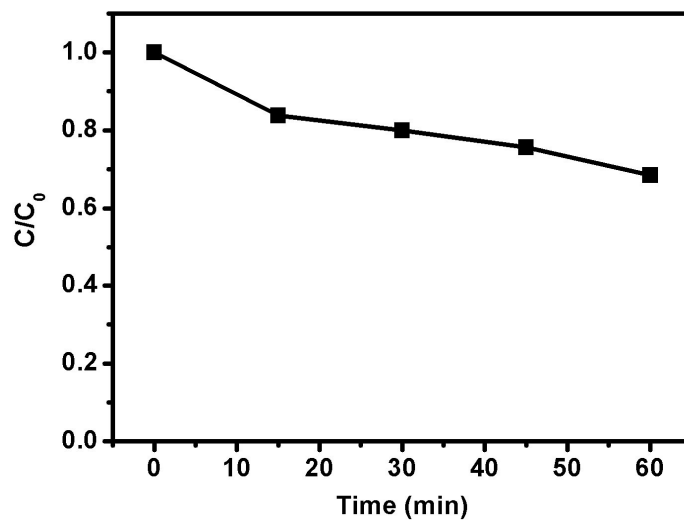

**Figure S7.** The atrazine degradation in the Na<sub>6</sub>TPP-EF system without applied any current (0 mA). 0.5 mM of Na<sub>6</sub>TPP was used as the electrolyte. The concentration of atrazine was 10 mg L<sup>-1</sup>, and the initial pH value was about 8.0.

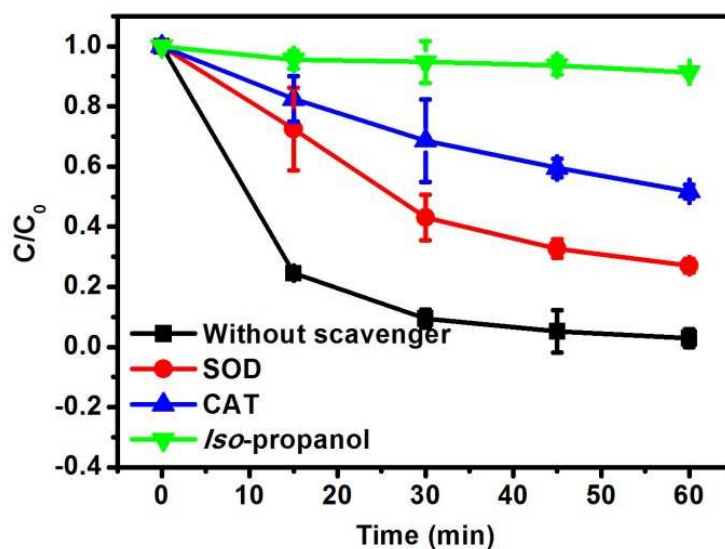

**Figure S8.** The atrazine degradation in the  $\text{Na}_6\text{TPP}$ -EF system with adding different scavengers. The constant current was 0.5 mA, the concentration of atrazine was  $10 \text{ mg L}^{-1}$ , 0.5 mM of  $\text{Na}_6\text{TPP}$  was used as electrolyte, and the initial pH values were about 8.0. The concentrations of SOD, CAT and *iso*-propanol were  $250\text{--}700 \text{ U mL}^{-1}$ ,  $400\text{--}1000 \text{ U mL}^{-1}$  and  $200 \text{ mM}$ , respectively.

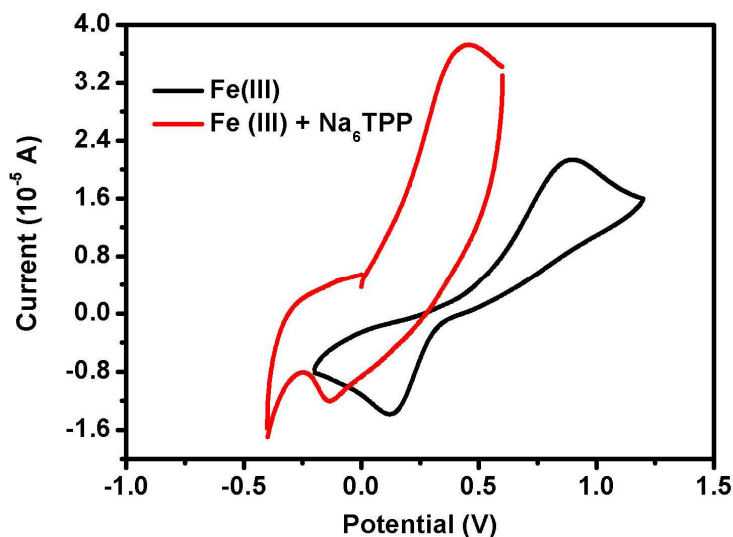

**Figure S9.** CV curves of Fe(III) and Fe(III) +  $\text{Na}_6\text{TPP}$  systems. Three electrode system, electrolyte:  $\text{Na}_2\text{SO}_4$ ,  $0.5 \text{ mol L}^{-1}$ , scan rate:  $5 \text{ mV s}^{-1}$ . The concentrations of Fe(III) and  $\text{Na}_6\text{TPP}$  were 0.3 and 0.5 mM, respectively.

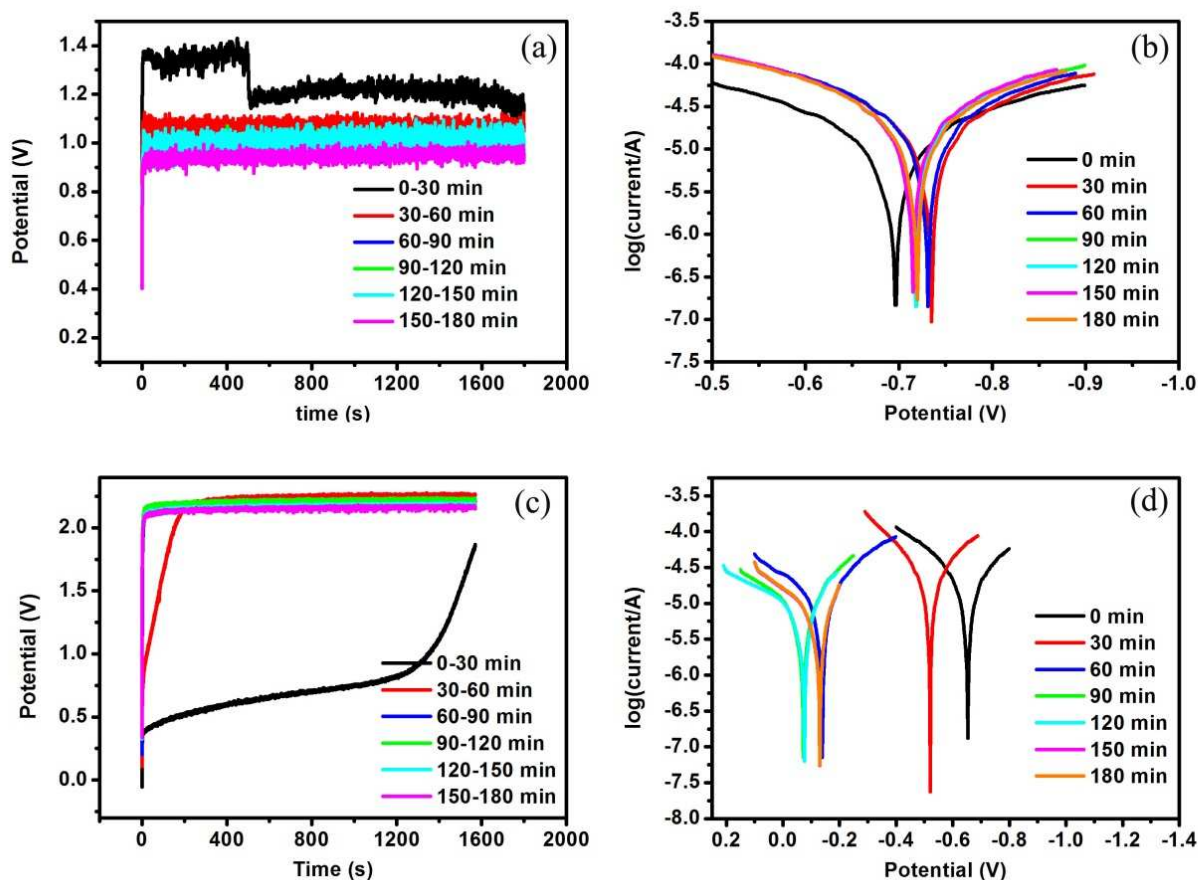

**Figure S10.** (a) and (c) Cell voltage verse time of the  $\text{Na}_2\text{SO}_4\text{-EF}$  and  $\text{Na}_6\text{TPP-EF}$  systems, respectively. (b) and (d) Tafel scans of iron electrode in the presence of 0.5 mM  $\text{Na}_2\text{SO}_4$  and  $\text{Na}_6\text{TPP}$ , respectively.

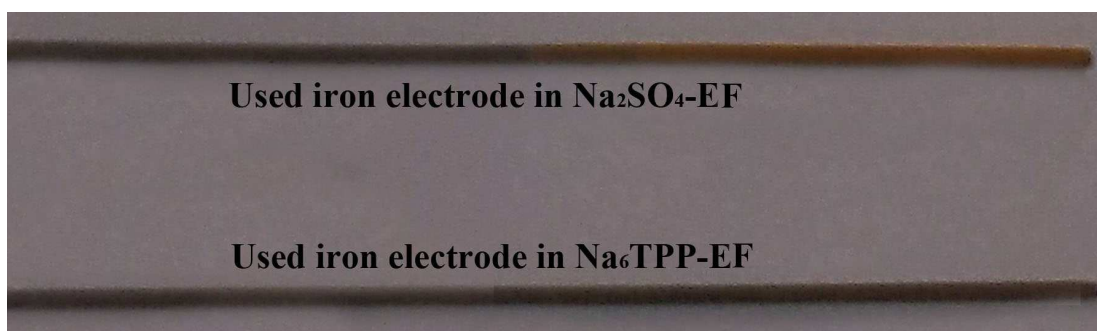

**Figure S11.** Pictures of the used iron electrodes in the  $\text{Na}_2\text{SO}_4\text{-EF}$  and  $\text{Na}_6\text{TPP-EF}$  systems after 180 min.



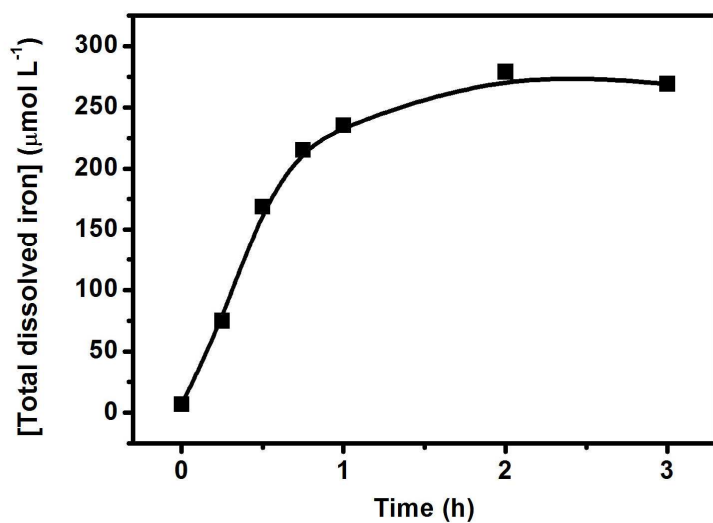

**Figure S12.** The concentration of total dissolved iron as a function of time during the degradation of 50 mL of a  $20 \text{ mg L}^{-1}$  atrazine solution with  $0.5 \text{ mM Na}_6\text{TPP}$  as the electrolyte at a constant current of  $0.5 \text{ mA}$  and  $\text{pH } 8.0$ .

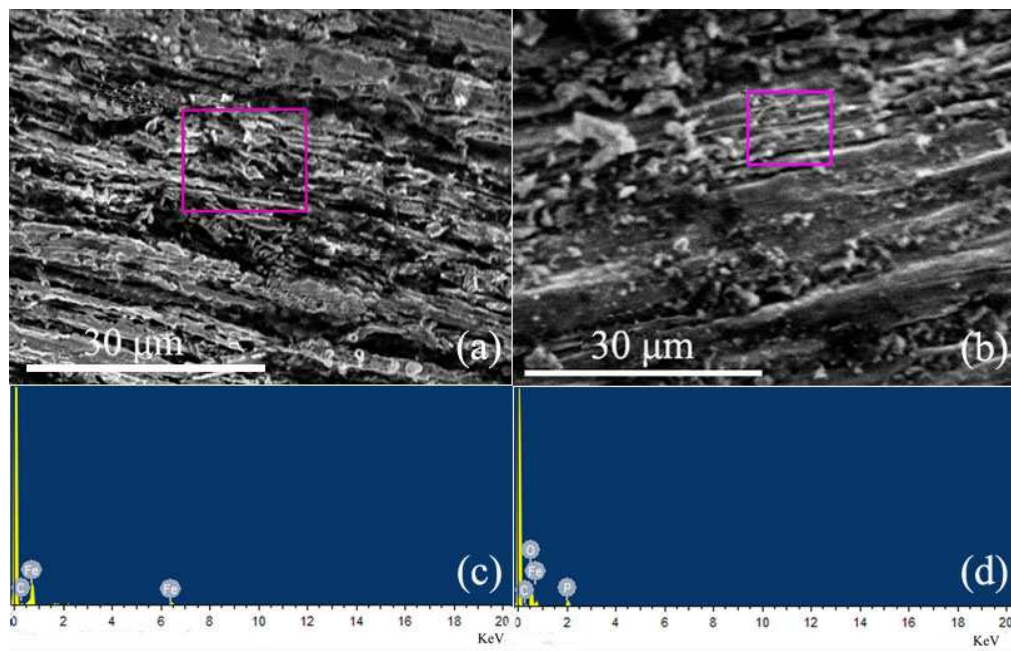

**Figure S13.** SEM images of the pristine iron electrode (a) and the used iron electrode in the  $\text{Na}_6\text{TPP-EF}$  system (b); EDS graphs of the pristine iron electrode (c) and the used iron electrode in the  $\text{Na}_6\text{TPP-EF}$  system (d).

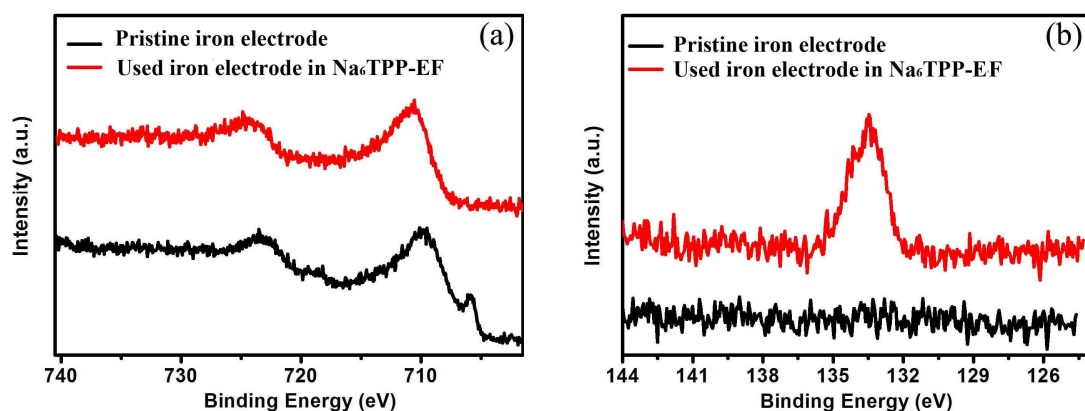

**Figure S14.** (a) High-resolution XPS of Fe 2p and Fe<sup>0</sup> of the pristine iron electrode and the used iron electrode in the Na<sub>6</sub>TPP-EF system. (b) High-resolution XPS of P 2p of the pristine iron electrode and the used iron electrode in the Na<sub>6</sub>TPP-EF system.

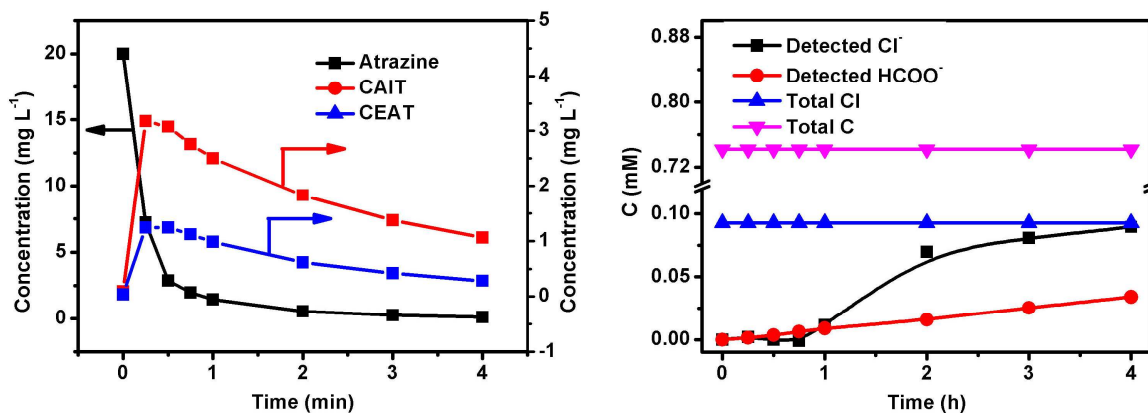

**Figure S15.** (a) Decay of atrazine concentration and evolution of the main aromatic intermediates (b) Evolution of chloride ions and formic acid during the degradation of 50 mL of a 20 mg L<sup>-1</sup> atrazine solution with 0.5 mM Na<sub>6</sub>TPP as the electrolyte at a constant current of 0.5 mA and pH 8.0.

**Table S1.** Chemical name, structural formula and abbreviation of atrazine and its degradation intermediates.

| Chemical Name                                          | Structural Formula                                                                  | Abbreviation | Detected               |
|--------------------------------------------------------|-------------------------------------------------------------------------------------|--------------|------------------------|
| 2-Chloro-4-ethylamino-6-isopropylamino-1,3,5-triazine  | 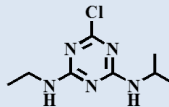   | Atrazine     | HPLC<br>GC-MS<br>LC-MS |
| 2-Chloro-4-acetamido-6-isopropylamino-1,3,5-triazine   |    | CAITM        | LC-MS                  |
| 2-Chloro-4-amino-6-isopropylamino-1,3,5-triazine       |    | CAIT         | HPLC<br>GC-MS<br>LC-MS |
| 2-Chloro-4-ethylamino-6-Amino-1,3,5-triazine           |    | CEAT         | HPLC<br>GC-MS<br>LC-MS |
| 2-Chloro-4,6-diamino-1,3,5-triazine                    |    | CAAT         | GC-MS                  |
| 2-Hydroxy-4-ethylamino-6-isopropylamino-1,3,5-triazine |   | HEIT         | LC-MS                  |
| 2-Hydroxy-4-acetamido-6-isopropylamino-1,3,5-triazine  |  | HAITM        | LC-MS                  |
| 2-Hydroxy-4-amino-6-isopropylamino-1,3,5-triazine      |  | HAIT         | LC-MS                  |
| 2-Hydroxyl-4-ethylamino-6-amino-1,3,5-triazine         |  | HEAT         | LC-MS                  |
| 2-Hydroxy-4,6-diamino-1,3,5-triazine                   |  | OAAT         | LC-MS                  |

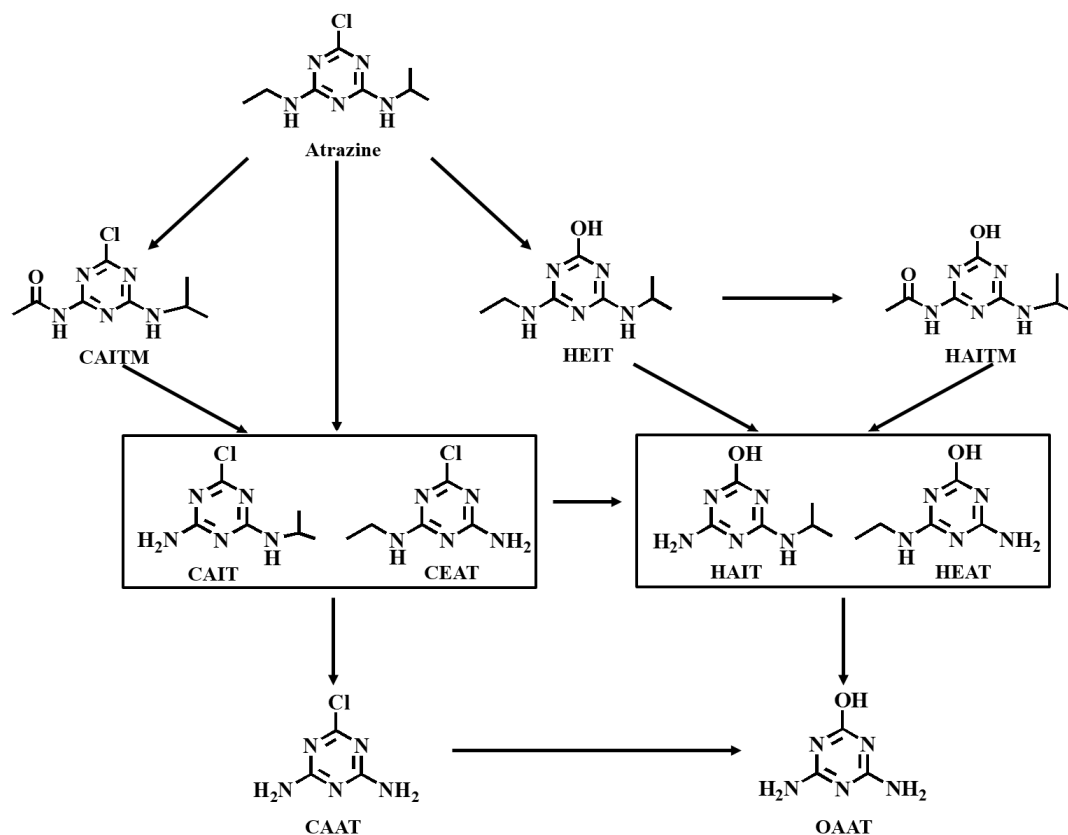

**Scheme S1.** A possible degradation pathway of atrazine in the Na<sub>6</sub>TPP-EF system.

**Table S2.** The TPP and Fe(III)-TPP complex recovery with anion exchange resin.

|                      | TPP    | Fe(III)+ TPP |          |
|----------------------|--------|--------------|----------|
|                      |        | TPP          | Fe(III)  |
| Before the treatment | 0.5 mM | 0.5 mM       | 0.25 mM  |
| After the treatment  | 0      | 0            | 0.052 mM |
